# Supplementary material
Source: PubMed Central journal article supplement (PMC4932838)
Supplement: NIHMS793823-supplement-Supplement_1.pdf [file NIHMS793823-supplement-Supplement_1.pdf]

| Number | IPI         | Name   | M Wt (kDa) | # Unique Peptides | % Coverage | Peptide Sequence          | Spectra |
|--------|-------------|--------|------------|-------------------|------------|---------------------------|---------|
| 1      | IPI0000874  | PRDX1  | 22.1       | 2                 | 9.5        | ADEGISFR                  | 1       |
|        | IPI0000874  | PRDX1  | 22.1       | 2                 | 9.5        | QITVNDLPVGR               | 3       |
| 2      | IPI00022488 | HPX    | 51.6       | 7                 | 22         | NFPSPVDAAFR               | 1       |
|        |             |        |            |                   |            | LLQDEFPGIPSPLDAAVECHR     | 1       |
|        |             |        |            |                   |            | YYCFQGNQFLR               | 2       |
|        |             |        |            |                   |            | GGYTLVSGYPK               | 1       |
|        |             |        |            |                   |            | EVGTPHGIILDSVDAAAFICPGSSR | 1       |
|        |             |        |            |                   |            | RLWWLDLK                  | 1       |
|        |             |        |            |                   |            | SGAQATWTELPWPHEK          | 4       |
| 3      | IPI00007960 | POSTN  | 93.3       | 11                | 21.8       | DQGNPVCALQQILGTK          | 2       |
|        |             |        |            |                   |            | LREEIEGK                  | 1       |
|        |             |        |            |                   |            | VLTQIGTSIQDFIEAEDDLSSFR   | 18      |
|        |             |        |            |                   |            | AAAITSDILEALGR            | 7       |
|        |             |        |            |                   |            | DGHFTLFAPTNEAFEK          | 9       |
|        |             |        |            |                   |            | DIVTNNNGVIHLIDQVLIPDSAK   | 5       |
|        |             |        |            |                   |            | VGLNELYNGQILETIGGK        | 8       |
|        |             |        |            |                   |            | FSTFLSLEAADLK             | 7       |
|        |             |        |            |                   |            | ELLTQPGDWTLFVPTNDAFK      | 10      |
|        |             |        |            |                   |            | LLYPADTPVGNDQLEILNK       | 11      |
|        |             |        |            |                   |            | IIDGVPVEITEK              | 2       |
| 4      | IPI00216691 | PROF1  | 15         | 2                 | 20         | DSPSVWAAVPGK              | 1       |
|        |             |        |            |                   |            | TFVNITPAEVGVLVGK          | 8       |
| 5      | IPI00072917 | COL6A3 | 322        | 77                | 36.2       | VGLVQFSDTPVTEFSLNTYQTK    | 2       |
|        |             |        |            |                   |            | SDILGHLR                  | 2       |
|        |             |        |            |                   |            | TLSGTPEESKR               | 2       |
|        |             |        |            |                   |            | AAPLQGLPGLLAPLR           | 4       |
|        |             |        |            |                   |            | LLPYIVGVAQR               | 2       |
|        |             |        |            |                   |            | MKPLDGSALYTGSAIDFVR       | 1       |
|        |             |        |            |                   |            | NNLFTSSAGYR               | 8       |
|        |             |        |            |                   |            | LLVLITGGK                 | 2       |
|        |             |        |            |                   |            | SLDEISQPAQELK             | 6       |
|        |             |        |            |                   |            | GADQAELEEIAFDSSLVFIPAEFR  | 3       |
|        |             |        |            |                   |            | DILFLFDGSANLVGQFPVVR      | 11      |
|        |             |        |            |                   |            | IIDELNVKPEGTR             | 4       |
|        |             |        |            |                   |            | IAVAQYSDDVKVESR           | 3       |
|        |             |        |            |                   |            | FDEHQSKPEILNLVK           | 5       |
|        |             |        |            |                   |            | ALNLGYALDYAQR             | 16      |
|        |             |        |            |                   |            | SSDRVDGPASNK              | 5       |
|        |             |        |            |                   |            | VDGPASNK                  | 1       |
|        |             |        |            |                   |            | QSGVVPFIFQAK              | 3       |
|        |             |        |            |                   |            | NADPAELEQIVLSPAFILAAESLPK | 14      |
|        |             |        |            |                   |            | IGDLHPQIVNLLK             | 4       |
|        |             |        |            |                   |            | DVVFLLDGSEGVR             | 4       |
|        |             |        |            |                   |            | SGFPLLK                   | 4       |
|        |             |        |            |                   |            | VVESLDVGQDR               | 9       |
|        |             |        |            |                   |            | VAVVQYSDR                 | 4       |
|        |             |        |            |                   |            | QLTLLGGPTPNTGAALFVLR      | 9       |
|        |             |        |            |                   |            | NILVSSAGSR                | 11      |
|        |             |        |            |                   |            | ITEGVPQLLIVLTADR          | 9       |
|        |             |        |            |                   |            | SGDDVRNPSVVVK             | 6       |
|        |             |        |            |                   |            | QLGTVQQVISER              | 9       |
|        |             |        |            |                   |            | VTQLTR                    | 1       |
|        |             |        |            |                   |            | LQPVLQPLPSPGVGGK          | 9       |
|        |             |        |            |                   |            | DVVFLIDGSQSAGPEFQYVR      | 15      |
|        |             |        |            |                   |            | LVDYLDVGFDTTR             | 29      |
|        |             |        |            |                   |            | VAVIQFSDDPK               | 4       |
|        |             |        |            |                   |            | VEFLNAHSSKDEVQNAVQR       | 1       |
|        |             |        |            |                   |            | DEVQNAVQR                 | 4       |
|        |             |        |            |                   |            | QINVGNALEYVSR             | 12      |
|        |             |        |            |                   |            | IEEGVPQFLVLISGK           | 8       |
|        |             |        |            |                   |            | SDDEVDDPAVELK             | 8       |
|        |             |        |            |                   |            | QFGVAPFTIAR               | 3       |
|        |             |        |            |                   |            | NADQEELVK                 | 14      |
|        |             |        |            |                   |            | ISLSPEYVFVSTFR            | 7       |
|        |             |        |            |                   |            | LLTPITTLTSEIQIK           | 14      |
|        |             |        |            |                   |            | RLNIGPSK                  | 8       |
|        |             |        |            |                   |            | LNIGPSK                   | 1       |

|    |             |        |       |    |      |                             |    |
|----|-------------|--------|-------|----|------|-----------------------------|----|
|    |             |        |       |    |      | VGVVQFSNDVFPEFYLK           | 7  |
|    |             |        |       |    |      | SQAPVLDAIR                  | 11 |
|    |             |        |       |    |      | ALEFVAR                     | 2  |
|    |             |        |       |    |      | IEDGVPQHLLVVLGGK            | 5  |
|    |             |        |       |    |      | SSGIVSLGVGDR                | 5  |
|    |             |        |       |    |      | NIDRTELQTITNDPR             | 2  |
|    |             |        |       |    |      | TELQTITNDPR                 | 7  |
|    |             |        |       |    |      | LVFTVR                      | 2  |
|    |             |        |       |    |      | DSFQEVLR                    | 9  |
|    |             |        |       |    |      | RQIIDAINK                   | 1  |
|    |             |        |       |    |      | VGLEHLR                     | 3  |
|    |             |        |       |    |      | VNHFVPEAGSR                 | 1  |
|    |             |        |       |    |      | VPQIAFVITGGK                | 10 |
|    |             |        |       |    |      | SVEDAQDVSLALTQR             | 9  |
|    |             |        |       |    |      | VFAVGVR                     | 10 |
|    |             |        |       |    |      | NIDSEEVGK                   | 10 |
|    |             |        |       |    |      | IASNSATAFR                  | 5  |
|    |             |        |       |    |      | ACNLDVILSFDGSR              | 6  |
|    |             |        |       |    |      | DQNVFVAQK                   | 8  |
|    |             |        |       |    |      | VSVVANTPSGPVEAFDFDEYQPEMLEK | 3  |
|    |             |        |       |    |      | SQHPYVLTEDTLK               | 5  |
|    |             |        |       |    |      | VVIHFTDGADGLADLHR           | 5  |
|    |             |        |       |    |      | ALILVGLER                   | 9  |
|    |             |        |       |    |      | VVNLER                      | 7  |
|    |             |        |       |    |      | LNLLLDYELAEQLDNIAEK         | 18 |
|    |             |        |       |    |      | GETGDDGRDGVGSEGR            | 5  |
|    |             |        |       |    |      | GDSIDQCALIQSIK              | 1  |
|    |             |        |       |    |      | DVLSIVNDLTIAESNCPR          | 6  |
|    |             |        |       |    |      | VAVVTYNNEVTTEIR             | 14 |
|    |             |        |       |    |      | NLQVALTSK                   | 4  |
|    |             |        |       |    |      | VAVFFSNTPTR                 | 2  |
|    |             |        |       |    |      | ALGSAIEYTIENVFESAPNPR       | 7  |
|    |             |        |       |    |      | LLDSFVSENAFYLSPIR           | 6  |
| 6  | IPI00218343 | TUBA1C | 49.8  | 9  | 30.5 | LIGQIVSSITASLR              | 2  |
|    |             |        |       |    |      | TIQFVDWCPTGFK               | 1  |
|    |             |        |       |    |      | LISQIVSSITASLR              | 6  |
|    |             |        |       |    |      | TIGGGDDSFNTFFSETGAGK        | 2  |
|    |             |        |       |    |      | AVFVDLEPTVIDEVR             | 10 |
|    |             |        |       |    |      | EIIDLVLDLDR                 | 4  |
|    |             |        |       |    |      | NLDIERPTYTNLNR              | 1  |
|    |             |        |       |    |      | FDGALNVDLTEFQTNLVPYPR       | 8  |
|    |             |        |       |    |      | VGINYQPPTVVPGGDLAK          | 4  |
| 7  | IPI0025465  | OGN    | 33.9  | 7  | 29.2 | DFADIPNLR                   | 9  |
|    |             |        |       |    |      | RLDFTGNLIEDIGTFSK           | 9  |
|    |             |        |       |    |      | LSLLEELSLAENQLLK            | 11 |
|    |             |        |       |    |      | LPVLPPK                     | 1  |
|    |             |        |       |    |      | LIHLQFNNIASITDDTFCK         | 2  |
|    |             |        |       |    |      | DRIEEIR                     | 2  |
|    |             |        |       |    |      | LEGNPIVLGK                  | 10 |
| 8  | IPI00477597 | HPR    | 39    | 3  | 8.6  | DIAPTLTLYVGK                | 1  |
|    |             |        |       |    |      | NPANPVQR                    | 1  |
|    |             |        |       |    |      | VTSIQDWVQK                  | 7  |
| 9  | IPI00479186 | PKM2   | 57.9  | 6  | 18.6 | LDIDSPITAR                  | 2  |
|    |             |        |       |    |      | NTGIICTIGPASR               | 2  |
|    |             |        |       |    |      | TATESFASDPILYRPVAVALDTK     | 2  |
|    |             |        |       |    |      | LAPITSDPTEATAVGAVEASFK      | 10 |
|    |             |        |       |    |      | APIIAVTR                    | 3  |
|    |             |        |       |    |      | GIFPVLCKDPVQEAWAEDVDLR      | 2  |
| 10 | IPI00465248 | ENO1   | 47.1  | 4  | 20   | AAVPSGASTGIYEALER           | 6  |
|    |             |        |       |    |      | DATNVGDEGGFAPNILENKEGLELLK  | 1  |
|    |             |        |       |    |      | YISPDQLADLYK                | 6  |
|    |             |        |       |    |      | SGETEDTFIADLVVGLCTGQIK      | 2  |
| 11 | IPI00164623 | C3     | 187.3 | 24 | 19.9 | TIYTPGSTVLYR                | 2  |
|    |             |        |       |    |      | AYYENSPQQVFSTEFEVK          | 6  |
|    |             |        |       |    |      | EYVLPSEFVIVEPTEK            | 5  |
|    |             |        |       |    |      | IPIEDGSGEVVLSR              | 4  |
|    |             |        |       |    |      | VLLDGVQNPR                  | 1  |
|    |             |        |       |    |      | VPVAVQGEDTVQSLTQGDGVAK      | 2  |

|    |             |        |       |    |      |                            |    |
|----|-------------|--------|-------|----|------|----------------------------|----|
|    |             |        |       |    |      | TKKQELSEAEQATR             | 1  |
|    |             |        |       |    |      | TELRPGETLNVNFFLR           | 1  |
|    |             |        |       |    |      | EPGQDLVVLPLSITDFIPSFR      | 2  |
|    |             |        |       |    |      | LVAYYTLIGASGQR             | 2  |
|    |             |        |       |    |      | IWDVVEK                    | 2  |
|    |             |        |       |    |      | ASHLGLAR                   | 1  |
|    |             |        |       |    |      | SNLDEDIIAEENIVSR           | 5  |
|    |             |        |       |    |      | LPYSVVR                    | 2  |
|    |             |        |       |    |      | NEQVEIR                    | 6  |
|    |             |        |       |    |      | SSLSVPYVIVPLK              | 3  |
|    |             |        |       |    |      | TGLQEVEVK                  | 6  |
|    |             |        |       |    |      | ILLDGTTPVAQMTEDAVIDAER     | 1  |
|    |             |        |       |    |      | DFDFVPPVVR                 | 3  |
|    |             |        |       |    |      | VHQYFNVELIQPGAVK           | 2  |
|    |             |        |       |    |      | ACEPGVDYVYK                | 1  |
|    |             |        |       |    |      | VQLSNDFDEYIMAEQTIK         | 1  |
|    |             |        |       |    |      | SGSDEVQVGGQR               | 3  |
|    |             |        |       |    |      | DTWVEHWPEEDECQDEENQK       | 2  |
| 12 | IPI00021841 | APOA1  | 30.7  | 4  | 18.9 | DYVSQFEGSALGK              | 4  |
|    |             |        |       |    |      | LLDNWDSVTSTFSK             | 4  |
|    |             |        |       |    |      | QGLLPVLESFK                | 5  |
|    |             |        |       |    |      | VSFLSALEEYTK               | 4  |
| 13 | IPI00021263 | KCIP-1 | 27.7  | 4  | 23   | SVTEQGAELSNEER             | 5  |
|    |             |        |       |    |      | DICNDVLSLEK                | 2  |
|    |             |        |       |    |      | YLAEVAAGDDKK               | 1  |
|    |             |        |       |    |      | TAFDEAIAELDTLSEESYK        | 4  |
| 14 | IPI00010790 | BGN    | 41.6  | 8  | 26.9 | VVQCSDLGLK                 | 3  |
|    |             |        |       |    |      | EISPDTTLLDLQNNDISELR       | 8  |
|    |             |        |       |    |      | NHLVEIPPNLPSLVELR          | 7  |
|    |             |        |       |    |      | GVFSGLR                    | 1  |
|    |             |        |       |    |      | DLPETLNELHLDHMK            | 1  |
|    |             |        |       |    |      | IQAIELEDLLR                | 9  |
|    |             |        |       |    |      | LGLGHNQIR                  | 2  |
|    |             |        |       |    |      | VPSGLPDLK                  | 3  |
| 15 | IPI00012119 | DCN    | 39.7  | 8  | 29.8 | DFEPSLGPVCPFR              | 4  |
|    |             |        |       |    |      | VVQCSDLGLDKVPK             | 1  |
|    |             |        |       |    |      | DLPPTLLDLQNNK              | 23 |
|    |             |        |       |    |      | ITEIKDGDFK                 | 1  |
|    |             |        |       |    |      | NLHALILVNNK                | 4  |
|    |             |        |       |    |      | VSPGAFPLVK                 | 2  |
|    |             |        |       |    |      | VPGGLAEHK                  | 3  |
|    |             |        |       |    |      | ASYSQVSLFSNPVQYWEIQPSTFR   | 1  |
| 16 | IPI00382938 | IGLV4  | 25.9  | 5  | 33.3 | AAPSVTLFPPSSEELQANK        | 16 |
|    |             |        |       |    |      | AGVETTTPSK                 | 9  |
|    |             |        |       |    |      | ATLVCLISDFYPGAVTVAWK       | 3  |
|    |             |        |       |    |      | YAASSYLSLTPEQWK            | 5  |
|    |             |        |       |    |      | SYSCQVTHEGSTVEK            | 4  |
| 17 | IPI00418163 | C4B    | 192.7 | 5  | 4.2  | LNMGITDLQGLR               | 1  |
|    |             |        |       |    |      | VGDTLNLNLR                 | 2  |
|    |             |        |       |    |      | SFFPENLWLR                 | 1  |
|    |             |        |       |    |      | VTASDPLDTLGSEGALSPGGVASLLR | 5  |
|    |             |        |       |    |      | VLSLAQEQVGGSPK             | 3  |
| 18 | IPI00430842 | IGHA1  | 52.8  | 7  | 16.8 | DASGVTFTWTPSSGK            | 4  |
|    |             |        |       |    |      | SAVQGGPPER                 | 2  |
|    |             |        |       |    |      | TFTCTAAYPESK               | 2  |
|    |             |        |       |    |      | TPLTATLSK                  | 5  |
|    |             |        |       |    |      | WLQGSQELPR                 | 5  |
|    |             |        |       |    |      | YLTWASR                    | 2  |
|    |             |        |       |    |      | QEPSQGTTFVAVTSILR          | 2  |
| 19 | IPI00465028 | TPI1   | 30.7  | 2  | 9.4  | VVLAYEPVWAIGTGK            | 5  |
|    |             |        |       |    |      | SNVSDAVAQSTR               | 5  |
| 20 | IPI00472610 | IGHM   | 52.6  | 14 | 45   | GPSVFLAPSSK                | 6  |
|    |             |        |       |    |      | GTTVTVSSASTK               | 5  |
|    |             |        |       |    |      | THTCPAPPELLGGPSVFLFPPKPK   | 1  |
|    |             |        |       |    |      | TPEVTCVVVDVSHEDPEVK        | 12 |
|    |             |        |       |    |      | FNWYVDGVEVHNAK             | 9  |
|    |             |        |       |    |      | TTPPVLDSDGSFFLYSK          | 23 |
|    |             |        |       |    |      | STSESTAALGCLVK             | 2  |

|    |             |         |       |    |      |                                    |    |
|----|-------------|---------|-------|----|------|------------------------------------|----|
|    |             |         |       |    |      | GFYPSDIAVEWESNGQPENNYK             | 17 |
|    |             |         |       |    |      | TPEVTCVVVDVSHEDPEVQFK              | 1  |
|    |             |         |       |    |      | WYVDGVEVHNAK                       | 2  |
|    |             |         |       |    |      | VVSVLTVLHQDWLNGK                   | 2  |
|    |             |         |       |    |      | DTLMISR                            | 10 |
|    |             |         |       |    |      | GPSVFPLA PCSR                      | 1  |
|    |             |         |       |    |      | NQCSLTCLVK                         | 4  |
| 21 | IPI00827679 | VIM     | 50    | 10 | 27.8 | SLYASSPGGVYATR                     | 1  |
|    |             |         |       |    |      | LLQDSVDFSLADAINTEFK                | 6  |
|    |             |         |       |    |      | VELQELNDR                          | 1  |
|    |             |         |       |    |      | ILLAELEQLK                         | 6  |
|    |             |         |       |    |      | EEAENTLQSFR                        | 1  |
|    |             |         |       |    |      | QDV DNASLAR                        | 1  |
|    |             |         |       |    |      | NLQEAEEWYK                         | 6  |
|    |             |         |       |    |      | FADLSEAANR                         | 5  |
|    |             |         |       |    |      | QVQSLTCEVDALK                      | 2  |
|    |             |         |       |    |      | ISLPLPNFSSNLNR                     | 3  |
| 22 | IPI00169383 | PGK1    | 44.6  | 3  | 11   | YSLEPVAVELK                        | 1  |
|    |             |         |       |    |      | ACANPAAGSVILLENLR                  | 2  |
|    |             |         |       |    |      | QIVWNGPVGVFWEAFAR                  | 2  |
| 23 | IPI00176193 | COL14A1 | 193.5 | 26 | 18.9 | TNQLNLQNTATK                       | 8  |
|    |             |         |       |    |      | HFLENLVTAFDVGSEK                   | 6  |
|    |             |         |       |    |      | DEVIEAVR                           | 10 |
|    |             |         |       |    |      | IGILITDGK                          | 4  |
|    |             |         |       |    |      | SQDDIIPPSR                         | 4  |
|    |             |         |       |    |      | ASAHAITGPTELITSEVTAR               | 11 |
|    |             |         |       |    |      | WDAVTGASGYLILYAPLTEGLAGDEK         | 1  |
|    |             |         |       |    |      | ISNVGSNSAR                         | 4  |
|    |             |         |       |    |      | IVYNNADGTEINEVEVDPIITFFPLK         | 8  |
|    |             |         |       |    |      | NLVVGDDETTSSLR                     | 6  |
|    |             |         |       |    |      | WDISDSVQQFR                        | 5  |
|    |             |         |       |    |      | VTVTPIYTDGEGVSVSAPGK               | 14 |
|    |             |         |       |    |      | TLPSSGPQNLNR                       | 7  |
|    |             |         |       |    |      | VSEEWYNR                           | 2  |
|    |             |         |       |    |      | ITWDPPSSPVK                        | 4  |
|    |             |         |       |    |      | TLFLGVTNLQAK                       | 7  |
|    |             |         |       |    |      | VVIESLQDR                          | 5  |
|    |             |         |       |    |      | IISFLYSTVGALNK                     | 4  |
|    |             |         |       |    |      | TKETLLDAIK                         | 4  |
|    |             |         |       |    |      | DTLFTAESGTR                        | 6  |
|    |             |         |       |    |      | VIVITDGR                           | 4  |
|    |             |         |       |    |      | HVFFVDDFDFDK                       | 2  |
|    |             |         |       |    |      | DGIDLAGFK                          | 4  |
|    |             |         |       |    |      | ILPDTQPFPALWEILNK                  | 11 |
|    |             |         |       |    |      | NSDPLVGVILDNGGK                    | 13 |
| 24 | IPI00217966 | LDHA    | 36.6  | 2  | 8.1  | DLADELALVDVIEDK                    | 4  |
|    |             |         |       |    |      | VIGSGCNLDSAR                       | 4  |
| 25 | IPI00291136 | COL6A1  | 108.5 | 17 | 24.8 | DAEEAISQTIIDTIVDIK                 | 1  |
|    |             |         |       |    |      | RFIDNLR                            | 2  |
|    |             |         |       |    |      | FIDNLR                             | 1  |
|    |             |         |       |    |      | YLIVVTDGHPLEGYKEPCGGLEDVNEAK       | 3  |
|    |             |         |       |    |      | VFSVAITPDHLEPR                     | 4  |
|    |             |         |       |    |      | LSIIADHTYR                         | 3  |
|    |             |         |       |    |      | SGDEGPPGSEGAR                      | 6  |
|    |             |         |       |    |      | SLQWMAGGTFTEALQYTR                 | 3  |
|    |             |         |       |    |      | IALVITDGR                          | 9  |
|    |             |         |       |    |      | DTTPLNVLCSPGIQVSVGIK               | 5  |
|    |             |         |       |    |      | DVDFDFIPGSDQLNVISCOGLAPSQGRPGLSLVK | 3  |
|    |             |         |       |    |      | ENYAELEDAFLK                       | 8  |
|    |             |         |       |    |      | LLLFSDBGNSQGATPAAIEK               | 21 |
|    |             |         |       |    |      | AGIEIFVVVGR                        | 1  |
|    |             |         |       |    |      | TAEYDVAYGESHLFR                    | 6  |
|    |             |         |       |    |      | VPSYQALLR                          | 8  |
|    |             |         |       |    |      | GVFHQTVSR                          | 2  |
| 26 | IPI00296099 | THBS1   | 129.3 | 4  | 5.1  | IEDANLIPPVPDDKFQDLVDAVR            | 2  |
|    |             |         |       |    |      | FVFGTTPEDILR                       | 1  |
|    |             |         |       |    |      | TIVTTLQDSIR                        | 2  |
|    |             |         |       |    |      | KVTEENKELANELR                     | 1  |

|    |             |          |       |    |      |                                 |    |
|----|-------------|----------|-------|----|------|---------------------------------|----|
| 27 | IPI00298971 | VTN      | 54.3  | 2  | 5.6  | DVWGIEGPIDAAFTR                 | 4  |
|    |             |          |       |    |      | FEDGVLDPDYPR                    | 1  |
| 28 | IPI00304840 | COL6A2   | 108.5 | 13 | 15.2 | NLQGISSFR                       | 10 |
|    |             |          |       |    |      | LFAVAPNQNLK                     | 12 |
|    |             |          |       |    |      | DIASTPHELYR                     | 7  |
|    |             |          |       |    |      | NDYATMLPDSTEIDQDTINR            | 3  |
|    |             |          |       |    |      | NFVINVVNR                       | 6  |
|    |             |          |       |    |      | NLEWIAGGTWTPSALK                | 14 |
|    |             |          |       |    |      | VFAVVITDGR                      | 7  |
|    |             |          |       |    |      | DDDLNLR                         | 9  |
|    |             |          |       |    |      | HESENLYSIACDKPQQVR              | 1  |
|    |             |          |       |    |      | LGEQNFHK                        | 9  |
|    |             |          |       |    |      | FVEQVAR                         | 6  |
|    |             |          |       |    |      | RDDDPLNAR                       | 12 |
|    |             |          |       |    |      | AAVFHEKDYDSLAQPGFFDR            | 2  |
| 29 | IPI00304925 | HSPA1    | 70    | 2  | 6.8  | DAGVIAGLNVLNLR                  | 1  |
|    |             |          |       |    |      | ELEQVCNPIISGLYQGAGGPGGGFGAQQGPK | 1  |
| 30 | IPI00419585 | PPIA     | 18    | 2  | 10.9 | VSFELFADK                       | 3  |
|    |             |          |       |    |      | FEDENFILK                       | 4  |
| 31 | IPI00553177 | SERPINA1 | 46.7  | 8  | 24.8 | SVLGQLGITK                      | 3  |
|    |             |          |       |    |      | VFSNGADLSGVTEEAPLK              | 10 |
|    |             |          |       |    |      | ITPNLAEFASFSLYR                 | 1  |
|    |             |          |       |    |      | AVLTIDEK                        | 1  |
|    |             |          |       |    |      | VVNPTQK                         | 1  |
|    |             |          |       |    |      | TLNQPDSQLQLTTGNGLFLSEGLK        | 11 |
|    |             |          |       |    |      | LQHLENELTHDIITK                 | 5  |
|    |             |          |       |    |      | SASLHLPK                        | 2  |
| 32 | IPI00010896 | CLIC1    | 26.9  | 2  | 14.5 | LAALNPESNTAGLDIFAK              | 2  |
|    |             |          |       |    |      | FLDGNELTLADCNLLPK               | 2  |
| 33 | IPI00455315 | ANXA2    | 38.6  | 5  | 20   | GVDEVTIVNILTNR                  | 4  |
|    |             |          |       |    |      | TPAQYDASELK                     | 5  |
|    |             |          |       |    |      | GLGTDEDSLIEIICSR                | 2  |
|    |             |          |       |    |      | TNQELQEINR                      | 4  |
|    |             |          |       |    |      | TDLEKDIISDTSGDFRK               | 1  |
| 34 | IPI00329801 | ANXA5    | 35.9  | 2  | 8.7  | GLGTDEESILTLTISR                | 1  |
|    |             |          |       |    |      | DLLDDLKSELTGK                   | 2  |
